# Supplementary figures and images for: T Cell-Mediated Tumor Killing-Related Classification of the Immune Microenvironment and Prognosis Prediction of Lung Adenocarcinoma
Source: MDPI journal article supplement (doi:10.3390/jcm11237223), 2022-12-05

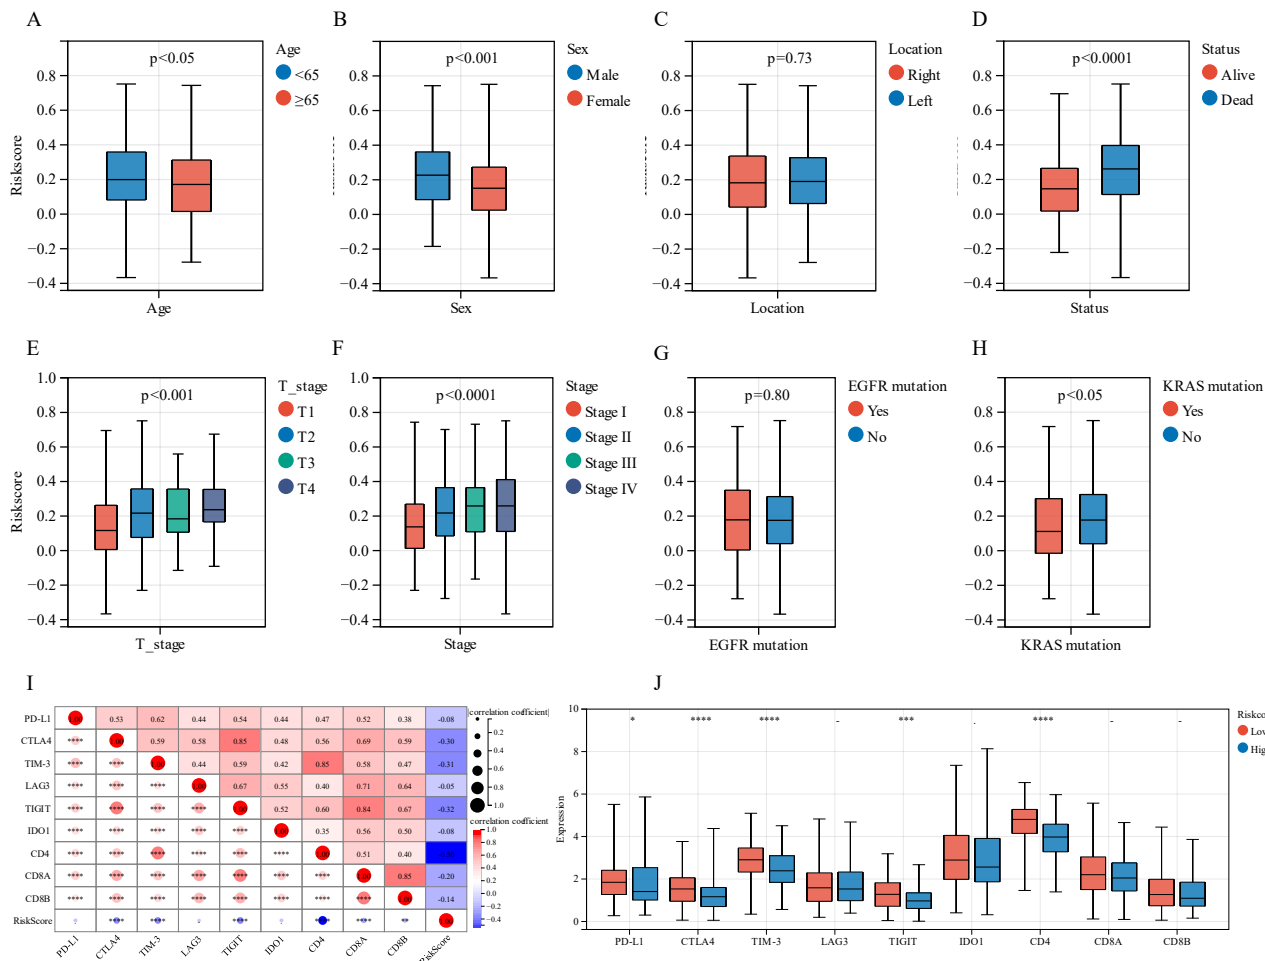

Supplement: s1 [file s1]

A

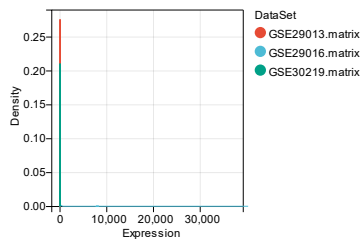

B

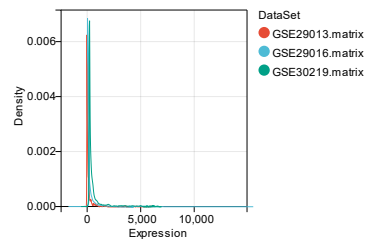

C

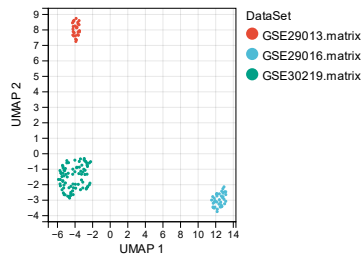

D

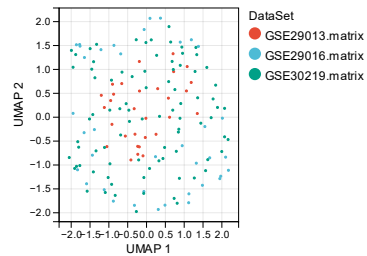

E

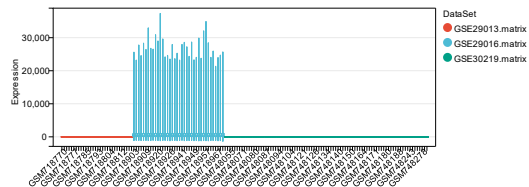

F

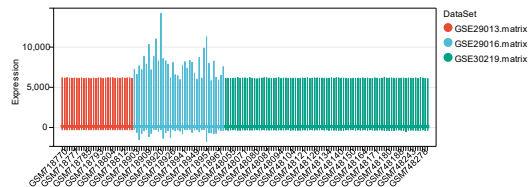

Supplement: s1 [file s1]

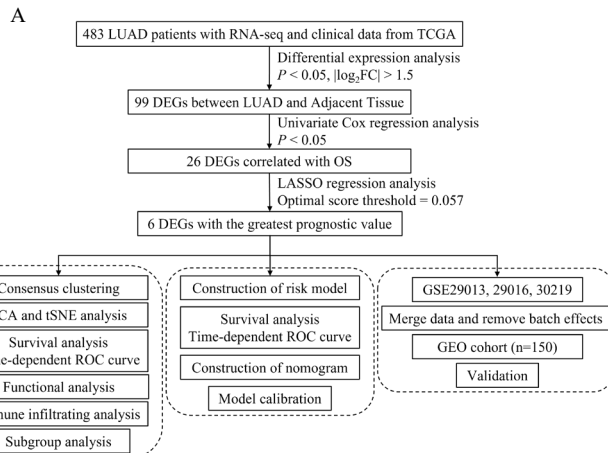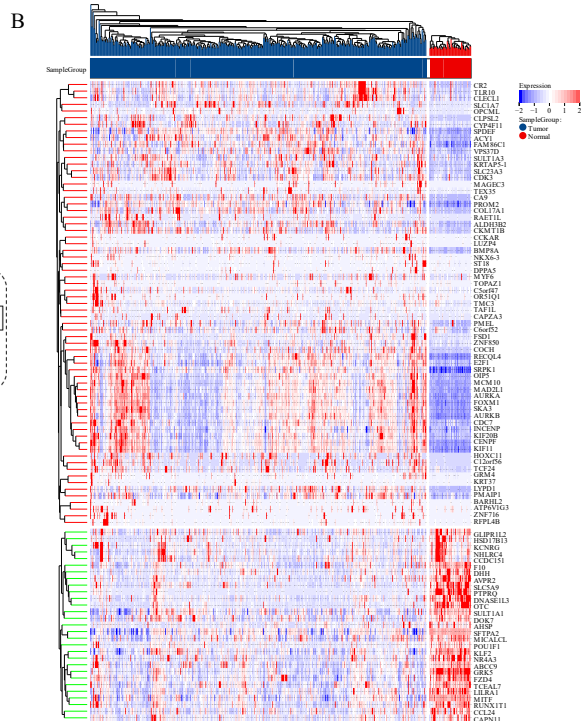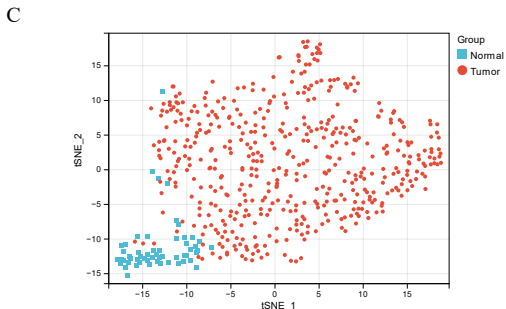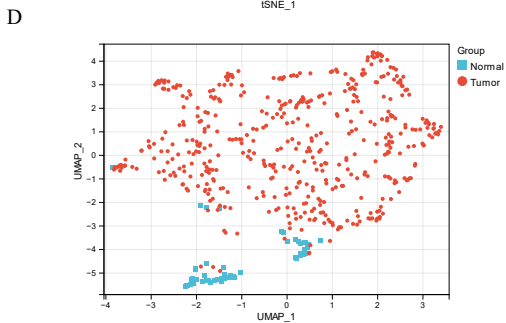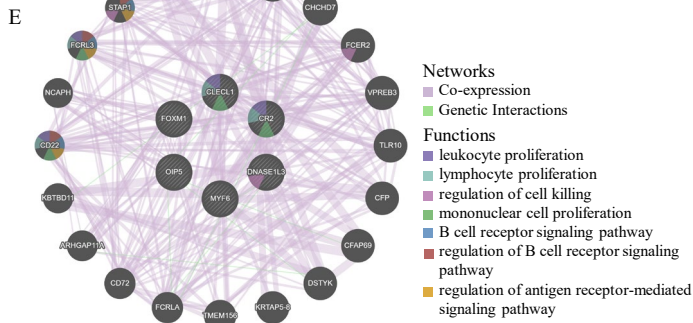

Supplement: s1 [file s1]

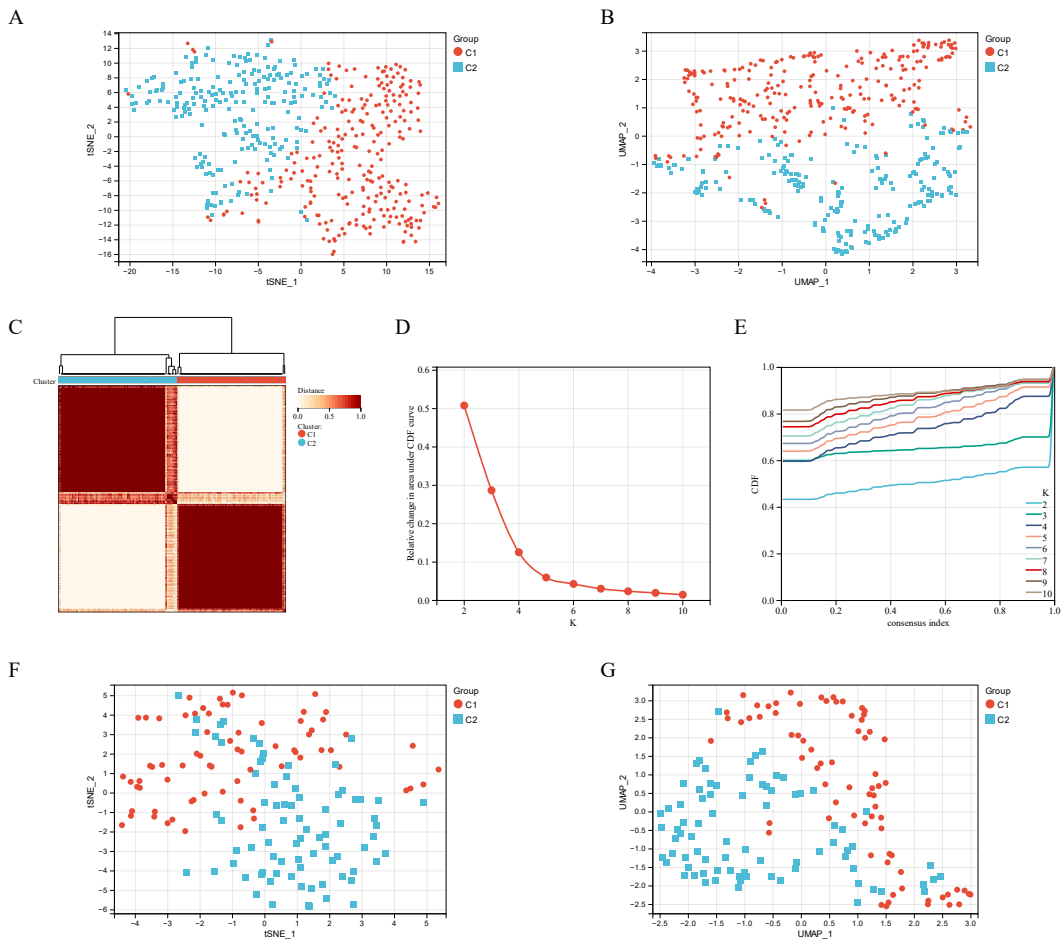

Supplement: s1 [file s1]

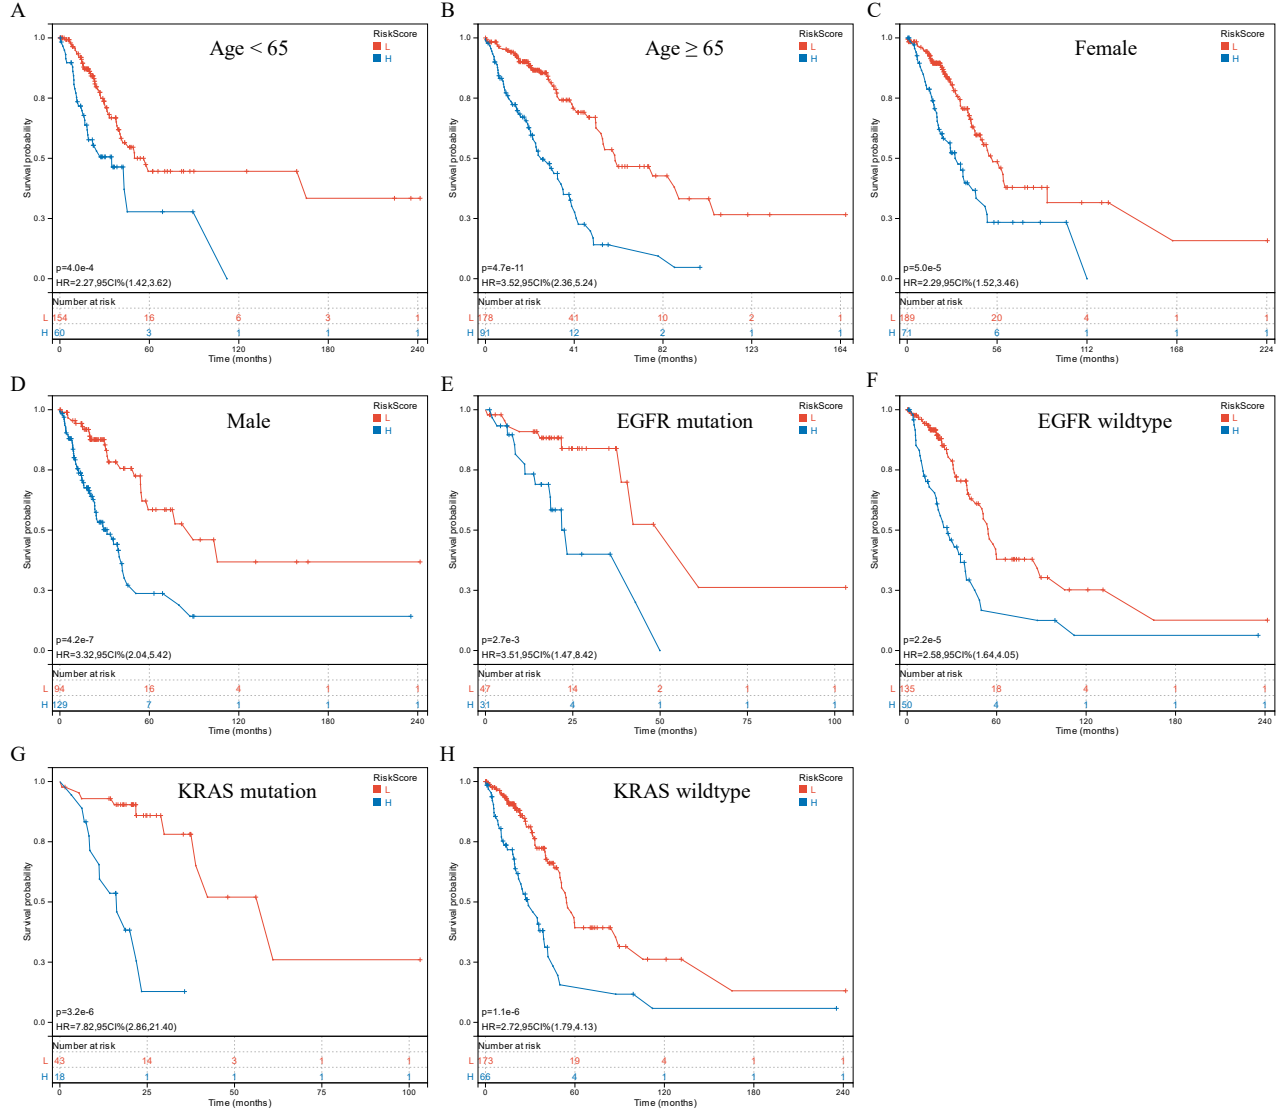

Supplement: s1 [file s1]
